# Supplementary material for: Integrated multi-omics reveals the beneficial roles of chlorogenic acid in improving the immune function of immunologically-stressed broilers
Source: Research Square preprint supplement (doi:10.21203/rs.3.rs-1673468/v1), 2022-05-31
Supplement: Supplementary file 1 [file 046833874a5efb053e6a1b0d.docx]

**Table S1** Composition and nutrient levels of basal diets (air-dry basis) %

| Item | Content |
| --- | --- |
|  | 1 to 3 weeks |
| Ingredients |  |
| Corn | 61.38 |
| Soybean meal | 31.00 |
| Fish meal | 2.00 |
| Soybean oil | 2.00 |
| Limestone | 1.50 |
| CaHPO4 | 1.30 |
| *DL-*Met | 0.22 |
| NaCl | 0.30 |
| Premix1） | 0.20 |
| Choline chloride | 0.10 |
| Total | 100.00 |
| Nutrient levels2） |  |
| ME/(MJ/kg) | 12.47 |
| CP | 20.55 |
| CF | 4.59 |
| Ca | 0.95 |
| AP | 0.46 |
| Lys | 1.10 |
| Met | 0.55 |

1)The premix provided the following per kg of diets: VA 8000 IU, VB1 4.2 mg, VB2 4 mg, VB6 4.5 mg, VB12 0.02 mg, VD3 3000 IU, VE 20 IU, VK3 2 mg, biotin 0.15 mg, folic acid 1.0 mg, *D*-pantothenic acid 11 mg, nicotinic acid 10 mg, Cu (as copper sulfate) 10 mg，Fe (as ferrous sulfate) 80 mg, Mn (as manganese sulfate) 80 mg, Zn (as zinc sulfate) 75 mg, I (as potassium iodide) 0.40 mg, Se (as sodium selenite) 0.30 mg.

2)The nutrient levels were calculated values.

**Table S2** Gene primers

| Gene | Primer sequence (5’-3’) | Product  size (bp) | GenBank accession No. |
| --- | --- | --- | --- |
| *IL-1β* | Forward: GCCTGCAGAAGAAGCCTCG  Reverse: GACGGGCTCAAAAACCTCCT | 203 | NM_204524.2 |
| *IL-4* | Forward: AGCCAGCACTGCCACAAGAAC  Reverse: GTGGAAGAAGGTACGTAGGTCTGC | 149 | NM_001007079.2 |
| *IL-6* | Forward: CTCGTCCGGAACAACCTCAA  Reverse: GGAGAGCTTCGTCAGGCATT | 96 | [NM_204628.2](https://www.ncbi.nlm.nih.gov/entrez/viewer.fcgi?db=nucleotide&id=2118951463) |
| *IL-10* | Forward: GAGATGCTGCGCTTCTACAC  Reverse: CCATGGCTTTGTAGATCCCGT | 223 | [NM_001004414.3](https://www.ncbi.nlm.nih.gov/entrez/viewer.fcgi?db=nucleotide&id=-2135407989) |
| *IL-12* | Forward: TGTCTCACCTGCTATTTGCCTTAC Reverse: GGATATGCTTGTTTCCACCA | 136 | NM_001030592.2 |
| *IL-18* | Forward: ATGAGCCCTGCATTCTGCC  Reverse: CTAAGCCGTACTGCACACAC | 240 | [NM_204608.3](https://www.ncbi.nlm.nih.gov/entrez/viewer.fcgi?db=nucleotide&id=2099352422) |
| *IL-22* | Forward: TGCTTGTACTGATGCCCCAA  Reverse: ATATCCATCTGTGCCCGCTT | 226 | NM_001398447.1 |
| *TNF-α* | Forward: TCTGAGGTTTCCGAAGTTATCAAG Reverse: AGGTAGCAGCCAACTAGAGAG | 103 | [XM_040698394.1](https://www.ncbi.nlm.nih.gov/entrez/viewer.fcgi?db=nucleotide&id=2024396198) |
| *IFN-γ* | Forward: ACCTTCCTGATGGCGTGAAG  Reverse: TCTCAAGTCGTTCATCGGGAG | 186 | [NM_205149.1](https://www.ncbi.nlm.nih.gov/entrez/viewer.fcgi?db=nucleotide&id=313850960) |
| *Caspase-3* | Forward: CTGCGTACCCTCAGCTCACT  Reverse: ACCTGATGGATCGCCATTGTA | 284 | NM_204725.2 |
| *Caspase-9* | Forward: TGACAAGAGCGACCACAGAC  Reverse: ATGGGAGAGGATGACCACGA | 280 | XM_424580.7 |
| *GAPDH* | Forward: GGGCACGCCATCACTATCTT  Reverse: TAACACGCTTAGCACCACCC | 148 | NM-204305.1 |

**Figure S1** Multiple reaction monitoring (MRM) analysis of jejunal proteins.
